# Supplementary material for: Thermodynamics of the S2-to-S3 state transition of the oxygen-evolving complex of photosystem II
Source: Royal Society of Chemistry journal article supplement (doi:10.1039/c9cp02308a), 2019-01-01
Supplement: c9cp02308a1.pdf [file c9cp02308a1.pdf]

## Supporting Information for:

### Thermodynamics of the S<sub>2</sub>-to-S<sub>3</sub> State Transition of the Oxygen-Evolving Complex of Photosystem II

Muhamed Amin<sup>1,2,3\*</sup>, Divya Kaur<sup>4,5</sup>, Ke R. Yang<sup>6</sup>, Jimin Wang<sup>7</sup>, Zainab Mohamed<sup>8</sup>, Gary W. Brudvig<sup>6</sup>, M.R. Gunner<sup>4,5</sup> and Victor Batista<sup>6</sup>

<sup>1</sup> Center for Free-Electron Laser Science, Deutsches Elektronen-Synchrotron DESY, Notkestrasse 85, 22607 Hamburg, Germany

<sup>2</sup> Physics Department, University College Groningen, University of Groningen, Groningen, Netherlands

<sup>3</sup> Centre for Theoretical Physics, The British University in Egypt, Sherouk City 11837, Cairo, Egypt

<sup>4</sup>Department of Physics, City College of the City University of New York, New York, NY 10031, United States

<sup>5</sup>Ph.D. Program in Chemistry, The Graduate Center of the City University of New York, New York, NY 10016, United States

<sup>6</sup> Department of Chemistry, Yale University, New Haven, Connecticut 06520-8107, United States

<sup>7</sup>Department of Molecular Biophysics and Biochemistry, Yale University, New Haven, CT08620-8114

<sup>8</sup> Zewail City of Science and Technology, Sheikh Zayed, District, 6th of October City, 12588 Giza, Egypt

[Muhamed.amin@cfel.de](mailto:Muhamed.amin@cfel.de)

#### 1- Mn spin densities for optimized S<sub>3</sub> state structure.

| Table S1. The total energies and atomic spin densities of the Mn centers in the S <sub>3</sub> state |                           |                       |
|------------------------------------------------------------------------------------------------------|---------------------------|-----------------------|
|                                                                                                      | Spin densities            |                       |
|                                                                                                      | Mn1-O7, E189 <sup>0</sup> | Mn1-E189 <sup>-</sup> |
| Mn1                                                                                                  | 2.942898                  | 3.110379              |
| Mn2                                                                                                  | 3.027931                  | 3.016139              |
| Mn3                                                                                                  | 2.939744                  | 2.909465              |
| Mn4                                                                                                  | 3.037126                  | 2.972186              |
| DFT (B97D) Energies (Hartree)                                                                        |                           |                       |
|                                                                                                      | -6372.99867963            | -6372.99484693        |

The difference in total energy between the 2 states is 2.4 kcal/mol. Thus, the two states are isoenergetic.

#### 2- Figure S1. The Mn cluster in the S<sub>3</sub> state.

a) The open S<sub>3</sub> model.

b) The closed S<sub>3</sub> model.

c) The proposed S<sub>3</sub> model.

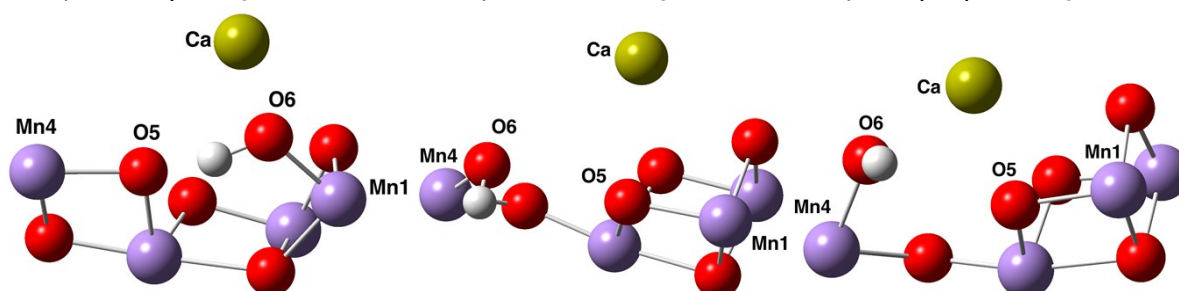

**a) The atomic coordinates of the S<sub>3</sub> state model with O7 bound to Mn1 and D1-E189 protonated:**

|   |          |         |          |
|---|----------|---------|----------|
| C | 8.31218  | 3.59127 | -1.06653 |
| C | 7.64049  | 3.40489 | 0.30683  |
| C | 6.13521  | 3.65811 | 0.25782  |
| O | 5.43217  | 2.89152 | 1.09338  |
| O | 5.63343  | 4.50706 | -0.48640 |
| H | 8.05668  | 4.13304 | 1.02305  |
| H | 8.08662  | 4.59153 | -1.45913 |
| H | 7.83570  | 2.40986 | 0.72654  |
| H | 9.40297  | 3.48723 | -0.97559 |
| H | 7.95388  | 2.85144 | -1.79861 |
| C | -4.42580 | 6.89976 | 0.96293  |
| C | -5.63927 | 6.02215 | 0.58770  |
| C | -5.28077 | 4.83211 | -0.28434 |
| C | -5.32517 | 3.52011 | 0.22169  |
| C | -4.90442 | 5.00220 | -1.63332 |
| C | -5.03621 | 2.40811 | -0.58269 |
| C | -4.61968 | 3.90232 | -2.45514 |
| C | -4.70803 | 2.59183 | -1.94179 |
| O | -4.49801 | 1.53268 | -2.79209 |
| H | -5.09149 | 0.73584 | -2.49237 |
| H | -3.67717 | 6.31314 | 1.51622  |
| H | -6.37617 | 6.65125 | 0.06203  |
| H | -5.61456 | 3.36299 | 1.26390  |
| H | -4.83895 | 6.01280 | -2.04224 |
| H | -5.09250 | 1.39938 | -0.17561 |
| H | -4.35750 | 4.03221 | -3.50523 |
| H | -6.13190 | 5.66160 | 1.50497  |
| C | -0.98004 | 8.14610 | 2.49347  |
| C | -0.69713 | 6.98608 | 1.53967  |
| O | -0.11515 | 5.95181 | 1.93759  |
| C | -1.71244 | 7.64952 | 3.75721  |
| H | -0.00636 | 8.57344 | 2.78017  |
| H | -1.82600 | 8.46566 | 4.48374  |
| H | -1.13864 | 6.83850 | 4.22654  |
| N | -1.12686 | 7.14126 | 0.27110  |
| C | -1.84611 | 6.70012 | -1.98557 |
| O | -2.50459 | 7.75002 | -1.90379 |
| C | -1.07205 | 6.11926 | -0.77262 |
| C | -1.70257 | 4.76655 | -0.33494 |
| C | -0.77083 | 3.56580 | -0.18377 |
| O | -1.31881 | 2.46756 | 0.07499  |
| O | 0.48854  | 3.78844 | -0.34596 |
| H | -2.46589 | 4.43935 | -1.05257 |

|   |          |          |          |
|---|----------|----------|----------|
| H | -2.23245 | 4.88531  | 0.61548  |
| N | -1.76997 | 5.95189  | -3.11090 |
| C | -2.53233 | 6.34275  | -4.27637 |
| C | -2.42925 | 5.39121  | -5.44854 |
| O | -1.76393 | 4.36961  | -5.49841 |
| H | -3.04885 | 5.71409  | -6.32009 |
| H | -2.23696 | 7.34720  | -4.63660 |
| H | -3.60637 | 6.44435  | -4.02930 |
| H | -1.18094 | 5.10206  | -3.13476 |
| C | -6.98586 | -5.33471 | -2.33971 |
| O | -6.70918 | -6.08019 | -1.39435 |
| C | -6.10070 | -5.21774 | -3.58392 |
| C | -5.02928 | -4.11671 | -3.35990 |
| C | -4.24991 | -4.37223 | -2.06450 |
| C | -3.02784 | -3.51553 | -1.85473 |
| O | -2.44395 | -2.89230 | -2.76202 |
| O | -2.62033 | -3.52921 | -0.59358 |
| H | -3.89078 | -5.41285 | -2.01951 |
| H | -5.50962 | -3.12681 | -3.31228 |
| H | -4.89870 | -4.26368 | -1.18778 |
| H | -4.33611 | -4.10185 | -4.21251 |
| N | -8.04677 | -4.46141 | -2.31516 |
| C | -8.73169 | -4.09484 | -1.07723 |
| C | -8.88033 | -2.55556 | -0.97083 |
| C | -7.59176 | -1.81975 | -1.19497 |
| C | -7.22643 | -0.85083 | -2.11260 |
| N | -6.44612 | -2.06844 | -0.45972 |
| C | -5.45412 | -1.27069 | -0.93879 |
| N | -5.89716 | -0.51458 | -1.94230 |
| H | -8.12918 | -4.48952 | -0.24750 |
| H | -9.30379 | -2.32156 | 0.01976  |
| H | -7.84246 | -0.37289 | -2.86771 |
| H | -4.45051 | -1.24981 | -0.52850 |
| H | -9.60585 | -2.19631 | -1.71702 |
| C | 7.72881  | -2.12987 | -2.17996 |
| O | 7.72126  | -3.00585 | -1.28588 |
| C | 7.37611  | -2.49417 | -3.62497 |
| C | 5.94705  | -2.02223 | -4.02364 |
| C | 4.83549  | -2.55622 | -3.16650 |
| C | 3.74105  | -1.93992 | -2.59121 |
| N | 4.67018  | -3.90826 | -2.87640 |
| C | 3.52240  | -4.07376 | -2.16540 |
| N | 2.94782  | -2.89084 | -1.97506 |
| H | 5.77251  | -2.32443 | -5.06979 |
| H | 3.45416  | -0.89652 | -2.58688 |
| H | 3.13062  | -5.01938 | -1.81292 |
| H | 5.90935  | -0.92360 | -4.00368 |
| N | 8.02274  | -0.82762 | -1.97230 |

|   |          |          |          |
|---|----------|----------|----------|
| C | 8.11087  | -0.23933 | -0.63061 |
| C | 6.71683  | -0.06315 | 0.01402  |
| C | 5.73436  | 0.55834  | -0.98086 |
| C | 4.28599  | 0.62270  | -0.55567 |
| O | 3.88018  | -0.19469 | 0.33989  |
| O | 3.56887  | 1.44255  | -1.21592 |
| H | 5.72057  | -0.03632 | -1.90507 |
| H | 8.74424  | -0.88313 | -0.00604 |
| H | 6.79156  | 0.56712  | 0.90967  |
| H | 6.03117  | 1.56442  | -1.28855 |
| H | 8.60386  | 0.73418  | -0.74674 |
| H | 6.34446  | -1.03613 | 0.34158  |
| C | 8.49663  | -3.71102 | 2.86210  |
| C | 7.30848  | -4.69998 | 2.82744  |
| C | 6.10886  | -4.12886 | 2.13230  |
| C | 4.78153  | -4.02480 | 2.50020  |
| N | 6.19292  | -3.54297 | 0.87476  |
| C | 4.98162  | -3.10229 | 0.50484  |
| N | 4.10795  | -3.38952 | 1.47017  |
| H | 8.82134  | -3.44933 | 1.84355  |
| H | 7.01118  | -4.97921 | 3.84806  |
| H | 4.27685  | -4.35157 | 3.40061  |
| H | 4.76776  | -2.53600 | -0.38711 |
| H | 7.61903  | -5.62930 | 2.32101  |
| H | 8.21742  | -2.78455 | 3.38419  |
| H | 9.35153  | -4.16317 | 3.38277  |
| C | -2.26391 | -6.63428 | 0.74477  |
| O | -2.44321 | -6.56495 | -0.47004 |
| C | -0.90433 | -7.03076 | 1.34760  |
| C | 0.25464  | -6.56492 | 0.44850  |
| C | 0.42231  | -5.04294 | 0.38303  |
| O | 0.06875  | -4.37679 | 1.42084  |
| O | 0.92463  | -4.57030 | -0.69063 |
| H | 0.10384  | -6.92957 | -0.57440 |
| H | 1.20326  | -6.98067 | 0.82628  |
| N | -3.25235 | -6.38560 | 1.67450  |
| C | -4.60429 | -5.96636 | 1.32658  |
| C | -4.92994 | -4.49249 | 1.63203  |
| O | -6.07689 | -4.05830 | 1.40585  |
| H | -4.75997 | -6.11855 | 0.25032  |
| N | -3.93236 | -3.74473 | 2.15345  |
| C | -4.00637 | -2.29030 | 2.32982  |
| C | -2.67565 | -1.67241 | 1.84561  |
| O | -2.66879 | -0.63493 | 1.15219  |
| C | -4.27332 | -1.90633 | 3.80020  |
| O | -1.64599 | -2.34471 | 2.27222  |
| H | -4.32771 | -0.81205 | 3.90336  |
| H | -4.81553 | -1.90392 | 1.70143  |

|   |          |          |          |
|---|----------|----------|----------|
| H | -3.46618 | -2.28724 | 4.44110  |
| H | -3.00151 | -4.15195 | 2.18393  |
| H | -5.22948 | -2.34119 | 4.12064  |
| C | 1.67205  | 0.39540  | 7.06346  |
| C | 1.42718  | 0.12351  | 5.57124  |
| C | 2.20657  | -1.12714 | 5.08401  |
| C | 1.91660  | -1.34523 | 3.60790  |
| O | 1.03003  | -2.24375 | 3.32606  |
| O | 2.52073  | -0.58280 | 2.78631  |
| H | 1.90049  | -2.01283 | 5.65798  |
| H | 2.74125  | 0.57052  | 7.25957  |
| H | 1.73915  | 0.98916  | 4.96830  |
| H | 3.28550  | -0.95723 | 5.21516  |
| H | 1.34869  | -0.45825 | 7.67936  |
| H | 0.35263  | -0.02986 | 5.38398  |
| H | 1.11543  | 1.28498  | 7.39312  |
| C | -3.81623 | 3.42480  | 6.76441  |
| C | -3.25268 | 3.98612  | 5.44932  |
| C | -3.44560 | 3.01802  | 4.27055  |
| C | -2.84985 | 3.55277  | 2.95596  |
| N | -1.39510 | 3.74578  | 3.01003  |
| C | -0.50381 | 2.74944  | 2.87509  |
| N | -0.89203 | 1.45494  | 2.95503  |
| N | 0.80936  | 3.03884  | 2.75185  |
| H | 1.35278  | 2.34855  | 2.20788  |
| H | -3.67127 | 4.13060  | 7.59521  |
| H | -2.17747 | 4.19863  | 5.56091  |
| H | -4.52077 | 2.83475  | 4.10581  |
| H | -3.27752 | 4.54075  | 2.73916  |
| H | -1.02405 | 4.67956  | 2.78885  |
| H | -1.86137 | 1.25804  | 2.73685  |
| H | 1.02607  | 3.99327  | 2.47423  |
| H | -3.31604 | 2.47990  | 7.02978  |
| H | -3.74107 | 4.94600  | 5.20833  |
| H | -2.98915 | 2.04625  | 4.51947  |
| H | -3.10093 | 2.90824  | 2.09707  |
| H | -0.25686 | 0.74100  | 2.56907  |
| H | -4.89497 | 3.22112  | 6.67537  |
| O | 3.01985  | 3.56130  | 0.54927  |
| H | 4.42470  | 3.09736  | 0.94337  |
| H | 3.29415  | 4.35582  | 0.04690  |
| O | 2.57346  | 3.70778  | -2.03891 |
| H | 1.82012  | 3.95108  | -2.62239 |
| O | -2.35453 | -0.07691 | -2.33288 |
| H | -3.07714 | 0.54422  | -2.60452 |
| H | -2.52638 | -0.95744 | -2.71610 |
| O | -0.50313 | -2.27570 | -0.21727 |
| O | 0.24930  | -0.55314 | 1.45987  |

|    |          |          |          |
|----|----------|----------|----------|
| O  | 1.85513  | -2.39800 | 0.77569  |
| O  | 1.63754  | 1.36844  | 0.74015  |
| O  | 1.49278  | -0.71718 | -0.97948 |
| O  | 0.02031  | 3.76108  | -3.30752 |
| H  | -0.26611 | 3.57632  | -4.21681 |
| H  | 0.14743  | 2.88282  | -2.84314 |
| O  | 6.95536  | 1.26020  | -3.70755 |
| H  | 7.38553  | 1.67166  | -4.46957 |
| H  | 6.27766  | 1.93901  | -3.41483 |
| O  | 5.25740  | 3.24005  | -3.02967 |
| H  | 5.58142  | 3.83473  | -2.32717 |
| H  | 4.30996  | 3.14432  | -2.78776 |
| Mn | 1.10915  | -2.51061 | -1.08102 |
| Mn | 0.14824  | -2.33973 | 1.53412  |
| Mn | 1.97361  | -0.36378 | 0.77653  |
| Mn | 1.99588  | 2.58241  | -0.69369 |
| Ca | -0.82566 | 0.25786  | -0.55895 |
| O  | 0.74831  | 1.65260  | -1.90653 |
| H  | 1.29098  | 1.03253  | -2.42160 |
| H  | -6.34688 | -2.77281 | 0.29467  |
| H  | 7.81815  | -0.15306 | -2.72167 |
| H  | -8.15172 | -3.83407 | -3.10432 |
| H  | -5.61059 | -6.18898 | -3.73318 |
| H  | -6.69409 | -4.98231 | -4.48164 |
| H  | -0.78737 | -6.62588 | 2.36291  |
| H  | -0.87691 | -8.13003 | 1.41715  |
| H  | -5.35274 | -6.58053 | 1.84785  |
| H  | 7.47559  | -3.58389 | -3.72172 |
| H  | 8.08795  | -2.02771 | -4.32126 |
| H  | 5.31892  | -4.64367 | -3.12709 |
| H  | 7.01308  | -3.38813 | 0.25751  |
| H  | -4.73412 | 7.74564  | 1.59673  |
| H  | -3.93736 | 7.29713  | 0.06323  |
| H  | -1.55657 | 8.93923  | 1.99401  |
| H  | -9.73034 | -4.55786 | -1.01998 |
| H  | -3.03278 | -6.52421 | 2.65358  |
| H  | -1.65668 | 7.97094  | 0.00579  |
| H  | -2.71521 | 7.27196  | 3.50578  |
| H  | -0.02760 | 5.93904  | -1.06598 |
| O  | 0.35896  | -2.54074 | -2.70219 |
| H  | -0.62101 | -2.69073 | -2.68746 |
| H  | 3.08536  | -3.06936 | 1.36431  |
| H  | -1.71266 | -3.03912 | -0.48479 |

**b) The atomic coordinates of the S<sub>3</sub> state model with D1-E189 ionized and bound to Mn1:**

|   |          |          |          |
|---|----------|----------|----------|
| C | -3.61712 | -7.98411 | -0.49812 |
| C | -3.03985 | -7.38027 | 0.79481  |
| C | -1.74094 | -6.60961 | 0.55605  |

|   |          |          |          |
|---|----------|----------|----------|
| O | -1.55831 | -5.58735 | 1.37737  |
| O | -0.94095 | -6.94433 | -0.33235 |
| H | -2.79961 | -8.18875 | 1.50567  |
| H | -2.86499 | -8.62343 | -0.97886 |
| H | -3.76259 | -6.72881 | 1.30331  |
| H | -4.50571 | -8.59272 | -0.27527 |
| H | -3.90402 | -7.20309 | -1.21933 |
| C | 8.01049  | -1.98665 | -1.05358 |
| C | 8.24155  | -0.88068 | -2.10544 |
| C | 6.96785  | -0.17633 | -2.54200 |
| C | 6.76459  | 1.18737  | -2.26352 |
| C | 5.96558  | -0.85402 | -3.27062 |
| C | 5.62804  | 1.87160  | -2.71888 |
| C | 4.81704  | -0.19190 | -3.72602 |
| C | 4.65350  | 1.18593  | -3.47208 |
| O | 3.56393  | 1.82780  | -4.00332 |
| H | 3.54049  | 2.81851  | -3.72999 |
| H | 7.52801  | -1.57427 | -0.15414 |
| H | 8.72994  | -1.33291 | -2.98488 |
| H | 7.52713  | 1.73541  | -1.70468 |
| H | 6.09232  | -1.91121 | -3.51065 |
| H | 5.50799  | 2.93811  | -2.52950 |
| H | 4.06453  | -0.72225 | -4.30941 |
| H | 8.94554  | -0.13402 | -1.70544 |
| C | 7.58017  | -4.20963 | 2.53845  |
| C | 6.18194  | -3.98894 | 1.96469  |
| O | 5.21646  | -3.64583 | 2.68689  |
| C | 7.54430  | -4.87446 | 3.92542  |
| H | 8.19330  | -4.79163 | 1.83327  |
| H | 8.55560  | -4.92600 | 4.35137  |
| H | 7.14167  | -5.89526 | 3.85903  |
| N | 6.05259  | -4.15689 | 0.63052  |
| C | 4.86154  | -4.50231 | -1.45871 |
| O | 5.94684  | -4.75347 | -2.01614 |
| C | 4.81247  | -3.83380 | -0.06950 |
| C | 4.62889  | -2.29281 | -0.17495 |
| C | 3.17764  | -1.84496 | -0.32823 |
| O | 2.91136  | -0.62662 | -0.31207 |
| O | 2.35972  | -2.84402 | -0.41680 |
| H | 5.20773  | -1.86682 | -1.00584 |
| H | 5.00136  | -1.82813 | 0.74783  |
| N | 3.67314  | -4.78738 | -2.03736 |
| C | 3.66420  | -5.45577 | -3.33349 |
| C | 4.52134  | -4.70330 | -4.36428 |
| O | 4.29340  | -3.54694 | -4.69952 |
| H | 5.35621  | -5.27283 | -4.82545 |
| H | 2.61905  | -5.46639 | -3.67390 |
| H | 4.03539  | -6.48787 | -3.23963 |

|   |          |          |          |
|---|----------|----------|----------|
| H | 2.77867  | -4.48531 | -1.64213 |
| C | -1.01506 | 7.58419  | -1.95121 |
| O | -1.29141 | 8.44567  | -1.10585 |
| C | -2.01755 | 6.49977  | -2.38036 |
| C | -1.40054 | 5.10668  | -2.60997 |
| C | -2.47567 | 4.01653  | -2.81066 |
| C | -1.80924 | 2.69526  | -3.16216 |
| O | -1.03843 | 2.61585  | -4.13220 |
| O | -2.06287 | 1.62285  | -2.42712 |
| H | -3.12113 | 4.29197  | -3.66164 |
| H | -0.77950 | 4.83841  | -1.74593 |
| H | -3.09798 | 3.91020  | -1.91606 |
| H | -0.76231 | 5.10159  | -3.50726 |
| N | 0.19284  | 7.54807  | -2.59012 |
| C | 1.31105  | 8.40628  | -2.19844 |
| C | 2.58761  | 8.00084  | -2.97030 |
| C | 2.90068  | 6.53653  | -2.84467 |
| C | 3.08366  | 5.54123  | -3.78887 |
| N | 2.99580  | 5.89175  | -1.62114 |
| C | 3.22644  | 4.57310  | -1.85731 |
| N | 3.29266  | 4.32595  | -3.16418 |
| H | 1.48859  | 8.31415  | -1.11623 |
| H | 3.41957  | 8.61674  | -2.59273 |
| H | 3.08881  | 5.63528  | -4.87021 |
| H | 3.31228  | 3.83282  | -1.06920 |
| H | 2.47186  | 8.23184  | -4.03956 |
| C | -7.05607 | -3.40564 | -1.28931 |
| O | -7.52258 | -2.72175 | -0.34446 |
| C | -7.20217 | -2.93288 | -2.73607 |
| C | -5.89040 | -2.27583 | -3.26041 |
| C | -5.36781 | -1.16098 | -2.40332 |
| C | -4.10881 | -0.90347 | -1.90491 |
| N | -6.14347 | -0.08181 | -1.98494 |
| C | -5.36289 | 0.77407  | -1.27394 |
| N | -4.12665 | 0.28986  | -1.20230 |
| H | -6.07882 | -1.90371 | -4.28106 |
| H | -3.18684 | -1.45533 | -2.03671 |
| H | -5.69987 | 1.69813  | -0.82326 |
| H | -5.11039 | -3.04599 | -3.34101 |
| N | -6.38560 | -4.56203 | -1.12020 |
| C | -5.93809 | -5.02451 | 0.20025  |
| C | -4.75162 | -4.18508 | 0.72721  |
| C | -3.69810 | -4.01319 | -0.36803 |
| C | -2.49291 | -3.15142 | -0.06278 |
| O | -2.57367 | -2.28097 | 0.87628  |
| O | -1.51776 | -3.32392 | -0.85624 |
| H | -4.15603 | -3.54109 | -1.24722 |
| H | -6.78573 | -4.96977 | 0.89551  |



|   |           |          |          |
|---|-----------|----------|----------|
| H | -4.30911  | -4.66786 | 1.60885  |
| H | -3.32466  | -4.97901 | -0.71897 |
| H | -5.64124  | -6.07392 | 0.08145  |
| H | -5.13475  | -3.21309 | 1.04937  |
| C | -9.35234  | -0.85467 | 2.14347  |
| C | -8.62787  | 0.29688  | 1.40874  |
| C | -7.13926  | 0.24958  | 1.57969  |
| C | -6.22228  | 1.17436  | 2.03368  |
| N | -6.40642  | -0.88941 | 1.26111  |
| C | -5.10572  | -0.66651 | 1.49354  |
| N | -4.97589  | 0.57220  | 1.98085  |
| H | -9.03986  | -1.82639 | 1.73667  |
| H | -8.98549  | 1.27323  | 1.76534  |
| H | -6.36262  | 2.18411  | 2.39680  |
| H | -4.27117  | -1.33172 | 1.28735  |
| H | -8.86663  | 0.23706  | 0.33311  |
| H | -9.12990  | -0.83177 | 3.21972  |
| H | -10.43853 | -0.76086 | 2.00878  |
| C | -1.70133  | 6.27740  | 1.50928  |
| O | -1.23506  | 5.73863  | 0.50670  |
| C | -3.13115  | 6.03050  | 2.01258  |
| C | -3.88752  | 5.03792  | 1.11975  |
| C | -3.23370  | 3.65736  | 1.03685  |
| O | -2.40420  | 3.35035  | 1.95901  |
| O | -3.59794  | 2.90773  | 0.06296  |
| H | -3.96169  | 5.41827  | 0.09255  |
| H | -4.91690  | 4.91040  | 1.49253  |
| N | -0.94926  | 7.13000  | 2.29186  |
| C | 0.27202   | 7.72955  | 1.74550  |
| C | 1.44979   | 6.76467  | 1.54905  |
| O | 2.39622   | 7.11600  | 0.82049  |
| H | 0.06749   | 8.17517  | 0.76042  |
| N | 1.41437   | 5.59269  | 2.22986  |
| C | 2.32035   | 4.47727  | 1.95545  |
| C | 1.50592   | 3.26850  | 1.43603  |
| O | 1.92458   | 2.58609  | 0.48240  |
| C | 3.10872   | 4.05962  | 3.21447  |
| O | 0.43735   | 3.06268  | 2.15276  |
| H | 3.79096   | 3.22998  | 2.97075  |
| H | 3.01465   | 4.79881  | 1.17210  |
| H | 2.41625   | 3.73689  | 4.00513  |
| H | 0.54699   | 5.35375  | 2.70160  |
| H | 3.70531   | 4.90592  | 3.58018  |
| C | 0.38681   | -1.41159 | 7.19023  |
| C | 0.25316   | -1.00270 | 5.71549  |
| C | -1.12291  | -0.34788 | 5.42949  |
| C | -1.24785  | -0.00697 | 3.95126  |
| O | -1.19479  | 1.24026  | 3.63216  |

|   |          |          |          |
|---|----------|----------|----------|
| O | -1.34904 | -0.99530 | 3.15069  |
| H | -1.24915 | 0.56374  | 6.02941  |
| H | -0.39378 | -2.13720 | 7.46698  |
| H | 0.36421  | -1.88074 | 5.06289  |
| H | -1.91993 | -1.06222 | 5.68750  |
| H | 0.28815  | -0.53900 | 7.85498  |
| H | 1.05060  | -0.29539 | 5.43929  |
| H | 1.36581  | -1.87428 | 7.38088  |
| C | 3.91338  | -0.24127 | 7.69247  |
| C | 4.41184  | -0.69924 | 6.31248  |
| C | 4.42122  | 0.45359  | 5.29519  |
| C | 4.95646  | 0.03961  | 3.90916  |
| N | 4.25605  | -1.10305 | 3.31606  |
| C | 2.96278  | -1.09549 | 2.93761  |
| N | 2.24578  | 0.04767  | 2.96738  |
| N | 2.36662  | -2.24731 | 2.59294  |
| H | 1.48572  | -2.22196 | 2.04873  |
| H | 3.89496  | -1.07624 | 8.40785  |
| H | 3.76818  | -1.50773 | 5.93097  |
| H | 5.05317  | 1.27845  | 5.66362  |
| H | 6.00819  | -0.26584 | 3.99118  |
| H | 4.73716  | -2.00883 | 3.26690  |
| H | 2.76474  | 0.91470  | 2.98403  |
| H | 2.95123  | -3.07333 | 2.51050  |
| H | 2.89314  | 0.16570  | 7.62117  |
| H | 5.42883  | -1.11934 | 6.39793  |
| H | 3.39987  | 0.85357  | 5.19774  |
| H | 4.92861  | 0.89476  | 3.21001  |
| H | 1.34864  | 0.09891  | 2.44309  |
| H | 4.56430  | 0.54574  | 8.10399  |
| O | 0.55005  | -4.57962 | 0.50720  |
| H | -0.65487 | -5.08190 | 1.08291  |
| H | 0.70926  | -5.34561 | -0.07929 |
| O | 0.72585  | -4.20909 | -2.09679 |
| H | 0.95767  | -3.66463 | -2.89565 |
| O | 1.10663  | 1.23980  | -3.14925 |
| H | 1.98961  | 1.39168  | -3.57879 |
| H | 0.41843  | 1.73415  | -3.65170 |
| O | -0.96795 | 2.25648  | -0.06600 |
| O | 0.07720  | 0.47286  | 1.42256  |
| O | -2.46417 | 0.73089  | 1.29036  |
| O | 0.13370  | -1.99914 | 0.92060  |
| O | -1.42066 | -0.30148 | -0.65456 |
| O | 1.57807  | -2.82558 | -4.35183 |
| H | 2.55437  | -2.93197 | -4.33947 |
| H | 1.30837  | -3.21250 | -5.19707 |
| O | -4.39571 | -5.35978 | -3.06061 |
| H | -4.52111 | -5.96118 | -3.80734 |

|    |          |          |          |
|----|----------|----------|----------|
| H  | -3.40634 | -5.39521 | -2.88695 |
| O  | -1.75072 | -5.68885 | -2.73652 |
| H  | -1.53439 | -6.34213 | -2.04153 |
| H  | -1.10271 | -4.97691 | -2.54529 |
| Mn | -2.39500 | 1.25605  | -0.54371 |
| Mn | -1.01528 | 1.87246  | 1.72775  |
| Mn | -1.18024 | -0.86960 | 1.09644  |
| Mn | 0.45138  | -3.04563 | -0.66162 |
| Ca | 0.93884  | 0.61737  | -0.86826 |
| O  | 0.47756  | -1.58515 | -1.77157 |
| H  | -0.25666 | -1.53967 | -2.44018 |
| H  | 2.85757  | 6.32996  | -0.69778 |
| H  | -5.85114 | -4.93909 | -1.91689 |
| H  | 0.41594  | 6.74667  | -3.16952 |
| H  | -2.76461 | 6.45539  | -1.57847 |
| H  | -2.53218 | 6.83725  | -3.29672 |
| H  | -3.08278 | 5.65786  | 3.04676  |
| H  | -3.66939 | 6.99166  | 2.03241  |
| H  | 0.59877  | 8.52610  | 2.42792  |
| H  | -8.03952 | -2.22220 | -2.76481 |
| H  | -7.44834 | -3.77527 | -3.39803 |
| H  | -7.13786 | 0.01947  | -2.14140 |
| H  | -6.79696 | -1.72715 | 0.76675  |
| H  | 8.96527  | -2.44898 | -0.75560 |
| H  | 7.36227  | -2.77361 | -1.46286 |
| H  | 8.04971  | -3.21320 | 2.61284  |
| H  | 1.06354  | 9.45827  | -2.40424 |
| H  | -1.42886 | 7.64680  | 3.01967  |
| H  | 6.84763  | -4.41624 | 0.05297  |
| H  | 6.89887  | -4.29845 | 4.60161  |
| H  | 3.97885  | -4.24708 | 0.50983  |
| O  | -1.22501 | -0.80859 | -3.73300 |
| H  | -1.53551 | 0.01640  | -3.30095 |
| H  | -0.41722 | -0.52436 | -4.19266 |
| H  | -4.01345 | 0.97248  | 2.01379  |
